# Supplementary material for: The Carrot Phytoene Synthase 2 (DcPSY2) Promotes Salt Stress Tolerance through a Positive Regulation of Abscisic Acid and Abiotic-Related Genes in Nicotiana tabacum
Source: MDPI journal article supplement (doi:10.3390/plants12101925), 2023-05-09
Supplement: s1 [file s1]

## Supplementary Figures

>gb|DQ192187.1|:357-1673 *Daucus carota* subsp. *sativus* putative phytoene synthase (PSY2) mRNA, complete cds

**ATG**TCAGTTGCTATGTCCTGGATTGTTACTCCCAGTCTTGAGGTTTCCAATTGCTTCGGGTACTTGGAGA  
CTGCCCCGAGAGGGAACCCGAGTATTAGATCCATCTAGGTTGGGTTCCCGGGATAAGAATATGAGGTGTGG  
AGGCAGACTTGAGAAGGGTAAGCTGCGGAAGTGGAGTTCTAAATCTTCAATGCTGAATATAGCTATTCG  
TGTTTGGGTGGTTCTGAATTAGAGAATGGAAGTATATTTCTGTGCATTCAAGTATGGTAGTTAGTGCAG  
ATGGAGATATGGCAGTGTCTCAGAGAAAAAGGTATATGACGTGGTTCTTAAACAAGCAGCGTTGGTCAA  
AAGACAGTTCAGATCTGATGAGGAATTAGAGGTTAAGCCAGAAATGATTCTCCGGGGACTCTGAGCTTG  
TTAAGTGAAGCTTATGATCGATGCGGTGAAGTATGTGCTGAGTATGCCAAAACATTTTACTTGGGAACAC  
TACTGATGACCCAGAGAGGCGGAGGGCTATCTGGGCAATATATGTGTGGTGCAGAAGAACTGATGAATT  
GGTAGATGGACCTAATGCGTCACATATAACTCCTTCAGCTTTGGATAGGTGGGAGTTGAGATTAGAAGAT  
CTTTTCAAGGGGCGTCCATTTGATATGCTTGATGCTGCTTTATCAGATACAGTAATGAAGTTTCTGTG  
ACATCCAACCATTCAAAGATATGATTGAAGGGATGAGGATGGACCTTAAGAAGTCGAGATACAAAACTT  
CGACGAGCTATATCTTTATTGCTATTATGTTGCTGGTACTGTTGGATTGATGAGCGTTCCAATTATGGGC  
ATTGCACCTAATTCACAGGCAACAACGGAGAGTGTTTATAATGCTGCTTTGGCTTTAGGGCTTGCTAATC  
AATTGACTAACATACTCAGGGATGTTGGAGAAGATGCCAGAAGAGGAAGGGTTTATCTACCACAAGATGA  
ACTGGCTCAAGCAGGGCTTTCTGATGAAGATATATTTGCGGGGAAGGTTACCGATAAATGGAGGAATTC  
ATGAAGAAGCAAATTAAGAGGGCAAGGATGTTTTTCGATGAAGCACAAATAGGAGTAAGAGAACTCAGCC  
CAGCTAGTAGATGGCCGGTATGGGCATCACTGCTGTTGTACCGTCAAATACTAGATGAAATTGAAGCCAA  
CGATTACAATAATTTTACGAAGAGGGCTTATGTCAGCAAACCAAGAAAATACTTGCTTTGCCAGTTGCA  
TATGCAAAAGCTTTTGCTCCAACAGCAAGAACAAGTTCAACGTTTCTGAAAACAT**G**A

**Supplementary Figure 1. *DcPSY2* cloned sequence.** The coding sequence of *DcPSY2* (1276 bp) was amplified and cloned into pCR8® entry vector. Start and stop codons are highlighted in bold.

```

Query 184 TCTTTCAATGCTGAATATAGCTATTCGTGTTGGGTGGTTC-TGAATTAGAGAATGGAAG 242
      |||||
Sbjct 190 TCTTTAATGCTGATCCAAGATATTCATGCTTGGGTGGATCAAGAACT-GAAAAGGGAAG 248

Query 243 TATATTTT-CTGTGCATTCAAGTATGGTAGTTAGTGCAGATGGAGATATGGCAGTGTCTAT 301
      |||||
Sbjct 249 CA-GTTCTCTGTACAGTCCAGTTTGGTGGCTAGCCAGCTGGAGAAATGACAGTGTCTAT 307

Query 302 CAGAGAAAAAGGTATATGACGTGGTCTTAAACAAGCAGCGTTGGTCAAAAGACAGTTCA 361
      |||||
Sbjct 308 CAGAGAAAAAGGTCTATGATGTGGTATTGAAGCAAGCAGCTTTAGTGAAGAGGCAGCTGA 367

Query 362 GATCTGATGAGGAATTAGAGGTAAAGCCAGAAATGATTCTCCGGGGACTCTGAGCTTGT 421
      |||||
Sbjct 368 GATCTACCGATGAATTAGAAGTGAAACCTGATATAGTTGTTCCAGGGAATTTGGGCTTGT 427

Query 422 TAAGTGAAGCTTATGATCGATGCGGTGAAGTATGTGCTGAGTATGCCAAAACATTTTACT 481
      |||||
Sbjct 428 TGAGTGAAGCATATGATCGTTGTGGCGAAGTATGTGCAGAGTATGCCAAAGACATTTTACT 487

Query 482 TGGGAACACTACTGATGACCCAGAGAGCGGAGGGCTATCTGGGCAATATATGTGTGGT 541
      |||||
Sbjct 488 TAGGAACAAAGCTAATGACTCCAGAGAGAAGAAGAGCTATCTGGGCAATATATGTGTGGT 547

Query 542 GCAGAGAAGCTGATGAATTGGTAGATGGACCTAATGCGTCACATATAACTCCTTCAGCTT 601
      |||||
Sbjct 548 GCAGGAGAAGCGGATGAGCTAGTCGATGGCCCTAAAGCATCACACATAACTCCACAAGCTT 607

Query 602 TGGATAGGTGGGAGTTGAGATTAGAAGATCTTTTCAAGGGGCGTCCATTGATATGCTTG 661
      |||||
Sbjct 608 TAGACAGGTGGGAGGCCAGGCTGGAAGATATTTTCAAGTGGGCGGCCATTGATATGCTTG 667

Query 662 ATGCTGCTTTATCAGATACAGTAATGAAG-TTTCCTGTTGACATCCAACATTCAAAGAT 720
      |||||
Sbjct 668 ATGCTGCTTTATCCGATACTGTC-TCCAGATTCTCTGTTGATATTCAAGCATTCAGAGAT 726

Query 721 ATGATTGAAGGGATGAGGATGGACCTTAAGAAGTCGAGATACAAAACTTCGACGAGCTA 780
      |||||
Sbjct 727 ATGATAGAAGGAATGCGTATGGACTTGTGGAATCCAGATATAACAACCTCGATGAGCTA 786

Query 781 TATCTTTATTGCTATTATGTTGCTGGTACTGTTGGATTGATGAGCGTTCGAATTATGGGC 840
      |||||
Sbjct 787 TATCTCTATTGTTATTATGTTGCTGGTACAGTAGGACTGATGAGTGTCCAGTTATGGGT 846

Query 841 ATTGCACCTAATTCACAGGCAACCAAGAGAGTGTATATAATGCTGCTTTGGCTTTAGGG 900
      |||||
Sbjct 847 ATTGCACCTGAATCAAAGGCAACCAAGAGAGTGTATATAATGCTGCTTTGGCTTTAGGG 906

Query 901 CTGCTAATCAATTGACTAACATACTCAGGAGTGTGGAGAAGATGCCAGAGAGGGAAGG 960
      |||||
Sbjct 907 CTGCAAAATCAACTAACCAATATACTCAGAGATGTAGGAGAAGATGCCAGAGAGGACGA 966

Query 961 GTTATCTACCAAGATGAAGTGGCTCAAGCAGGGCTTCTGATGAAGATATATTGCG 1020
      |||||
Sbjct 967 GTATACCTTACCTCAAGATGAATTAGCACAGGCAGGGCTTCTGATGAAGATATATTGCT 1026

Query 1021 GGAAG-GTTACCGATAAATGGAGGAATTTATGAAGAAGCAAATTAAGAGGGCAAGGAT 1079
      |||||
Sbjct 1027 GG-AAGAGTGACGATAAGTGGAGGAACTTATGAAGAAACAATTCAGAGGGCGAGGAA 1085

Query 1080 GTTTTTCGATGAAGCACAAATAGGAGTAAGAGAAGTCAAGCCAGCTAGTAGATGGCCGGT 1139
      |||||
Sbjct 1086 ATTCTTTGATGAGTCAGAGAAAGGTGTCACAGAACTGGACTCTGCTAGTAGATGGCCGT 1145

Query 1140 ATGGGCATCACTGCTGTTGTACCGTCAA-ATACTAGATGAAATTGAAGCCAACGATTACA 1198
      |||||
Sbjct 1146 GTTAGCAGCGCTGCTGTTGTATCG-CAAGATATTGGACGAGATTGAAGCCAATGACTACA 1204

Query 1199 ATAATTTTACGAAGAGGGCTTATGTACGAAACCAAGAAAATACTTGTCTTGGCCAGTTG 1258
      |||||
Sbjct 1205 ATAACCTCACAGGAGGGCTTATGTTAGCAAGCCAAGAAAGCTTCTCACCTTGCCCATTTG 1264

Query 1259 CATATGCAAAAGCTTTTG 1276
      |||||
Sbjct 1265 CTTATGCAAAATCTCTTG 1282

```

**Supplementary Figure 2. *DcPSY2* and *NtPSY2* alignment.** The *DcPSY2* coding sequence (subject, 184bp-1276bp) presents 80% identity with *NtPSY2* (query, 190-1282bp; LOC107761716; XM 016579975.1). Score: 817 bits (442)

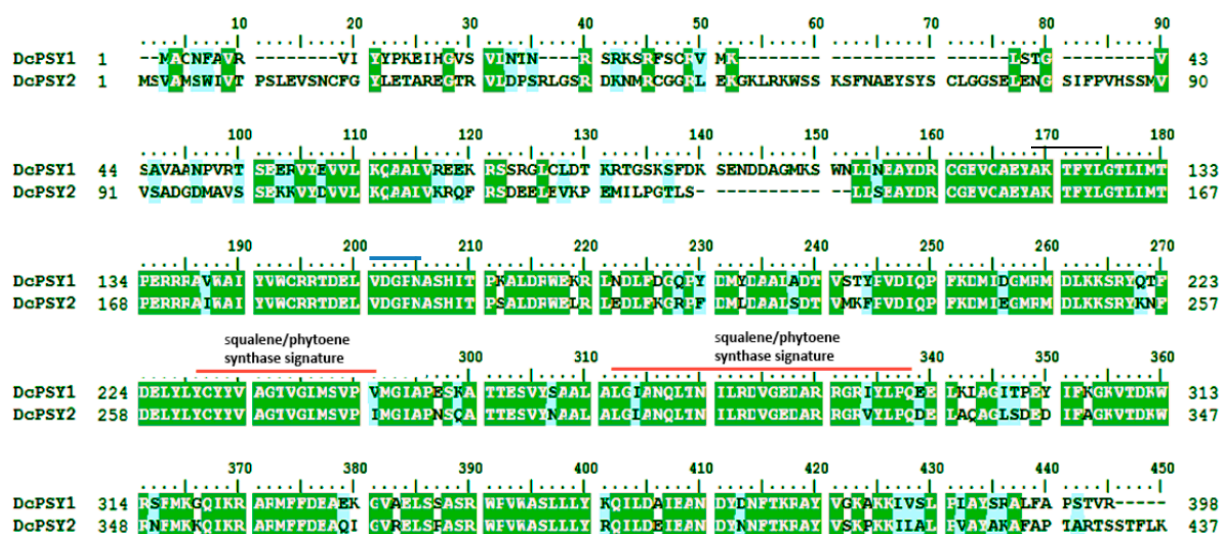

**Supplementary Figure 3. DcPSY1 and DcPSY2 alignment.** The predicted proteins DcPSY1 (398 aa) and DcPSY2 (437 aa) share 64% identity and present the same amino acids at the active site (highlighted in dark), Mg<sup>2+</sup> binding site (highlighted in blue). Two squalene/phytoene synthase signatures are present in both *D. carota* PSY proteins (in red). Identical amino acids are highlighted in green. Similar amino acids are highlighted in light blue. The squalene/phytoene synthase, isoprenoid synthase and the trans-isoprenyl diphosphate synthase domains are depicted in Figure 2A.

PSY-[A.thaliana] MSSSSAVLVWATSSLNPD-----MNNCG-LVRVLESSRLFSPO-----NORLNKGGKKQ-IPTWSSSFVR-NRSRRIG---VSSSLVASPSGEIALSSEKQYVNVVVKQAALVVKQLRSS 108

PSY-[N.pseudonarcissus] --MVVALRVVS-AIEIPIR-----LGFSEAN-WRFSSPKY-----DNLGRKKSRLSVSYSLTYTSKYACVG-FAENNKGFLIRSSLVANPAGEATISSSEKQYVDVVLKQAALVKDQTKSSR 107

PSY-[D.kaki] --MSVALLSVVSPNSEVSN--FGVFESSRREGNRVSDSKFIARYKSLICHVALKSKKSNVYGSFYADSSYPSPDGSGLKKGKFPULLSNVANPAGEMAVSSSEKQYVDVVLKQAALVVKQLRTG 122

PSY-[Z.mays] --MAITLVRAAS-----PGLSADS--TSHQGT-----LQCSLTLLTKRPAARRRMPCSLLGLHPWEAGRSP--AIVSSLPVMPAGEAVVSSSEKQYVDVVLKQAALVVKQLRTG 99

PSY1-[D.carota] --MACNFARVIV-----YPKIEHG--VSVLNT-----NRSRKSRSFCRMVMLS-----TGVSAAVANR-----VRTSEERVYEVVLKQAALVREEKRSSR 77

PSY2-[D.carota] --MSVAMSWIVTPSLEVSN-C-FGYLETAREGTRVLDPSRLGSRDKMRCGRLEKGLRKWSKSFNAEYSYSCLGSELENGSIFPVHSSMVVSADGMVAVSSEKQYVDVVLKQAALVVKQFRSD- 123

PSY1-[M.Domestica] --VKNFQMCSTIS-----FAGKTY-----IGESNGIRRRIRSMVTAAGA-----QVITAPKQSRPVPFPELSIQGFPLADLVHQEIVQRQSQTR- 77

PSY2-[M.Domestica] --MSGVLLVWVS-----PKNASSLLGLMPR-----ICTPRRSKFCPKLGFSSR-----VLAYSQAVVNP-----ARSSEKQYEVVVLKQAALVKEQSTVKR 80

PSY3-[M.Domestica] --MSVALVWVSPNTEVFK-FYGLDSSR-----FVLGHQSSIR-----AKMGKGDWKSCLCTDVKYSSVGGSGLGSEAKFPVLSLMVANPLGESAVSSEKQYVDVVLKQAALVVKQLRSN- 110

PSY4-[M.Domestica] --MSGVLLVWVS-----PKNASSPLGLLPR-----ICTPRRSKLSKLGFSFG-----VLAYSQAVANR-----ARSSEKQYEVVVLKQAALVREPNTVKR 80

PSY-[A.thaliana] YDLD-VKKPQ-----DVVLPGSLSLLVGEAYDRGCEVCAEAKTFYLGTLMTTPERRRAIWAIV-----VWCRRTDELVDSPINASHITPMALDRWEARLEDFRGRPFMDLDA 211

PSY-[N.pseudonarcissus] --KSTDVKP-----DIVLRGTVYLLK-DAYDRGCEVCAEAKTFYLGTLMTTPERRRAIWAIV-----VWCRRTDELVDSPINASHITPMALDRWEARLEDFRGRPFMDLDA 207

PSY-[D.kaki] --EDYEVKP-----DIVLRGTLSLMT-EAYDRGCEVCAEAKTFYLGTLMTTPERRRAIWAIV-----VWCRRTDELVDSPINASHITPMALDRWEARLEDFRGRPFMDLDA 222

PSY-[Z.mays] --VLDARPO-----DMDMP--RNLGK-EAYDRGCEVCAEAKTFYLGTLMTTPERRRAIWAIV-----VWCRRTDELVDSPINASHITPMALDRWEARLEDFRGRPFMDLDA 197

PSY1-[D.carota] GLCLDTKRTGSKSFDKSEN-DDAGMKSNNLLN-EAYDRGCEVCAEAKTFYLGTLMTTPERRRAIWAIV-----VWCRRTDELVDSPINASHITPMALDRWEARLEDFRGRPFMDLDA 189

PSY2-[D.carota] --EELVEKP-----EMILRGTLSLLS-EAYDRGCEVCAEAKTFYLGTLMTTPERRRAIWAIV-----VWCRRTDELVDSPINASHITPMALDRWEARLEDFRGRPFMDLDA 223

PSY1-[M.Domestica] --SVQEGG-----RRRQPNPSFLE-EAYERCKNLCAEAKTFYLGTLMTTPERRRAIWAIV-----VWCRRTDELVDSPINASHITPMALDRWEARLEDFRGRPFMDLDA 190

PSY2-[M.Domestica] SLXLDERTIVT-----EGLDNMQLLD-KAYDRGCEVCAEAKTFYLGTLMTTPERRRAIWAIV-----VWCRRTDELVDSPINASHITPMALDRWEARLEDFRGRPFMDLDA 181

PSY3-[M.Domestica] --GYLDVKP-----DILLRGNLSLLS-KAYDRGCEVCAEAKTFYLGTLMTTPERRRAIWAIV-----VWCRRTDELVDSPINASHITPMALDRWEARLEDFRGRPFMDLDA 210

PSY4-[M.Domestica] SLDLDERITE-----GLNNMDLLN-KAYDRGCEVCAEAKTFYLGTLMTTPERRRAIWAIV-----VWCRRTDELVDSPINASHITPMALDRWEARLEDFRGRPFMDLDA 180

PSY-[A.thaliana] LADTVARYPVDIOPFRDMIEGMRMDLKRKYQNFDDLYLYCYVYAGTVGLMSVPMVMDIPKSKATTESVYNAALALGIANQLTNILFDVGEDARRGRVYLPQDELAQAGLSDEDFRGRPFMDLDA 338

PSY-[N.pseudonarcissus] LSDTVKRFVVDIOPFRDMIEGMRMDLKRKYQNFDELYLYCYVYAGTVGLMSVPMVMDIPKSKATTESVYNAALALGIANQLTNILFDVGEDARRGRVYLPQDELAQAGLSDEDFRGRPFMDLDA 334

PSY-[D.kaki] LSDTVTKFPVDIOPFRDMIEGMRMDLKRKYQNFDELYLYCYVYAGTVGLMSVPMVMDIPKSKATTESVYNAALALGIANQLTNILFDVGEDARRGRVYLPQDELAQAGLSDEDFRGRPFMDLDA 349

PSY-[Z.mays] LSDTISRFPDIOPFRDMIEGMRMDLKRKYQNFDELYLYCYVYAGTVGLMSVPMVMDIPKSKATTESVYNAALALGIANQLTNILFDVGEDARRGRVYLPQDELAQAGLSDEDFRGRPFMDLDA 324

PSY1-[D.carota] LADTVSTYVVDIOPFRDMIEGMRMDLKRKYQNFDELYLYCYVYAGTVGLMSVPMVMDIPKSKATTESVYNAALALGIANQLTNILFDVGEDARRGRVYLPQDELAQAGLSDEDFRGRPFMDLDA 316

PSY2-[D.carota] LSDTVMKFPVDIOPFRDMIEGMRMDLKRKYQNFDELYLYCYVYAGTVGLMSVPMVMDIPKSKATTESVYNAALALGIANQLTNILFDVGEDARRGRVYLPQDELAQAGLSDEDFRGRPFMDLDA 350

PSY1-[M.Domestica] LTHTVFNPFLDIOPFRDMIEGMRMDLKRKYQNFDELYLYCYVYAGTVGLMSVPMVMDIPKSKATTESVYNAALALGIANQLTNILFDVGEDARRGRVYLPQDELAQAGLSDEDFRGRPFMDLDA 317

PSY2-[M.Domestica] LSDTVTKYVVDIOPFRDMIEGMRMDLKRKYQNFDELYLYCYVYAGTVGLMSVPMVMDIPKSKATTESVYNAALALGIANQLTNILFDVGEDARRGRVYLPQDELAQAGLSDEDFRGRPFMDLDA 308

PSY3-[M.Domestica] LSDTVTKFPVDIOPFRDMIEGMRMDLKRKYQNFDELYLYCYVYAGTVGLMSVPMVMDIPKSKATTESVYNAALALGIANQLTNILFDVGEDARRGRVYLPQDELAQAGLSDEDFRGRPFMDLDA 337

PSY4-[M.Domestica] LSDTVAKYVVDIOPFRDMIEGMRMDLKRKYQNFDELYLYCYVYAGTVGLMSVPMVMDIPKSKATTESVYNAALALGIANQLTNILFDVGEDARRGRVYLPQDELAQAGLSDEDFRGRPFMDLDA 307

PSY-[A.thaliana] MKRQDIKARMFDEAEKGVTELSEASRWPVWASLLLYRQILDTEANDYNNFTKRAYVSKAKKLALPLAYAKSLTKSSRLSI----- 423

PSY-[N.pseudonarcissus] MKRQDIKARTFFQAEKGVTELSEASRWPVWASLLLYRQILDTEANDYNNFTKRAYVSKAKKLALPLAYAKSLTKPLSLRPPSLSKA----- 423

PSY-[D.kaki] MKRQDIKARMKFFNEAEKGVTELSEASRWPVWASLLLYRQILDTEANDYNNFTKRAYVSKAKKLALPLAYAKSLTKPLSLRPPSLSKA----- 435

PSY-[Z.mays] MKRQDIKARMFDEAEKGVTELSEASRWPVWASLLLYRQILDTEANDYNNFTKRAYVSKAKKLALPLAYAKSLTKPLSLRPPSLSKA----- 410

PSY1-[D.carota] MKRQDIKARMFDEAEKGVTELSEASRWPVWASLLLYRQILDTEANDYNNFTKRAYVSKAKKLALPLAYAKSLTKPLSLRPPSLSKA----- 398

PSY2-[D.carota] MKRQDIKARMFDEAEKGVTELSEASRWPVWASLLLYRQILDTEANDYNNFTKRAYVSKAKKLALPLAYAKSLTKPLSLRPPSLSKA----- 438

PSY1-[M.Domestica] MKRQDIKARFYFNXAEAGSGLDKASRWPVWASLLLYRQILDTEANDYNNFTKRAYVSKAKKLALPLAYAKSLTKPLSLRPPSLSKA----- 400

PSY2-[M.Domestica] MKRQDIKARMFDEAEKGVTELSEASRWPVWASLLLYRQILDTEANDYNNFTKRAYVSKAKKLALPLAYAKSLTKPLSLRPPSLSKA----- 396

PSY3-[M.Domestica] MKRQDIKARMFDEAEKGVTELSEASRWPVWASLLLYRQILDTEANDYNNFTKRAYVSKAKKLALPLAYAKSLTKPLSLRPPSLSKA----- 427

PSY4-[M.Domestica] MKRQDIKARMFDEAEKGVTELSEASRWPVWASLLLYRQILDTEANDYNNFTKRAYVSKAKKLALPLAYAKSLTKPLSLRPPSLSKA----- 395

**Supplementary Figure 4. Multiple alignment of amino acid sequences of different enzymes encoded by PSY genes.** The figure shows the alignment of the amino acid sequence of AtPSY (GenBank accession number: AAA32836.1), NpPSY (CAA55391.1), DkPSY (ACM44688.1), ZmPSY (ACY70935.1), DcPSY1 (DQ192186.1), and DcPSY2 (DQ192187.1). In addition, the characteristic functional domain of the PSY enzymes (Trans\_IPPS-HH) are indicated; the aspartate-rich regions (red rectangles), the residues that cover the active site (green rectangles) and those residues that comprise both the active site and the substrate-binding pocket (black underlined). Those residues that are most conserved among the analyzed proteins are shown on a gray background, the higher the hue of this color, the higher the degree of conservation.

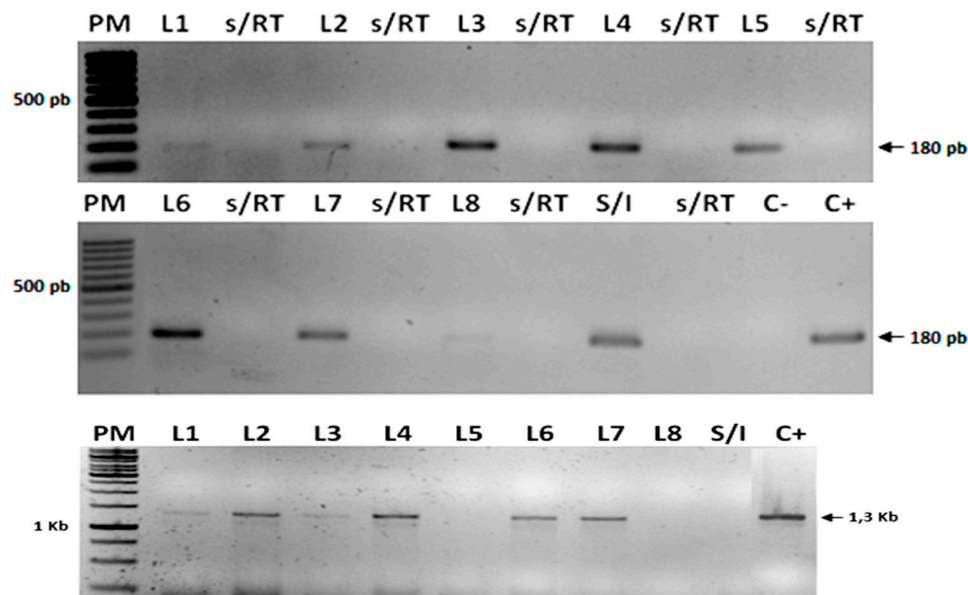

**Supplementary Figure 5: Amplification by RT-PCR of the *rRNA18S* and *DcPSY2* from the transgenic *N.tabacum* lines transformed with pGWB2-DcPSY2.** RT-PCR was carried out in L1-L8 for the endogenous *rRNA18S* (180bp) and the complete coding sequence of the transgene *DcPSY2* (1300bp). In the s/RT lanes, the respective controls without RT were loaded, in which mRNA from the lines analyzed was used as a template to determine the presence of gDNA in the samples. The positive control (C+) for *rRNA18S* corresponds to gDNA of wild-type *N. tabacum*. The positive control (C+) of *DcPSY2* corresponds to pDNA of the pGWB2/DcPSY2 vector. S/I: amplification using cDNA from *N. tabacum* transformed with the pGWB2 empty vector (negative control). C-: Negative control, without adding DNA. MW: 1 Kb molecular weight standard. EtBr-stained 1% agarose gel electrophoresis.

**Supplementary Table S1. List of primers used in this work.** *DcPSY1* (DQ192186), *DcPSY2* (DQ192187), *NtPSY1* (JF461341), *NtPSY2* (JX101475), *NtLCYB* (KC484706), *NtNCED3* (JX101472.1), *NtOsmotin* (X61679.1), *RNAr18S* (AJ236016.1) and *Nt EIF1 $\alpha$*  (AF120093.1)

| Gene                                     | Primer name  | Sequence<br>(5'→3')                  | Used for                               |
|------------------------------------------|--------------|--------------------------------------|----------------------------------------|
| <b><i>UBI</i></b>                        | ubiq-F       | GCTCGAGGACGGCAGAAC                   | qRT-PCR                                |
|                                          | ubiq-R       | CTTGGGCTTGGTGTAGGTCTTC               |                                        |
| <b><i>18S</i></b>                        | 18SF         | TTGATTACGTCCCTGCCCTTT                | qRT-PCR                                |
|                                          | 18SR         | ACAATGATCCTTCCGCAGGT                 |                                        |
| <b><i>DcPSY1</i></b>                     | psy1q-F      | AGTCGATGGAGCATTACCATAATTC            | qRT-PCR                                |
|                                          | psy1q-R      | CTAATGGGTTACAGAGGGTTGTGTTA           |                                        |
| <b><i>DcPSY2</i></b>                     | psy2q-F      | GCTAATAAACTTCCGTGGGTGTTT             | qRT-PCR                                |
|                                          | psy2q-R      | GCTGGAGTTAGTGCTACCC                  |                                        |
| <b><i>DcPSY2 cds</i></b>                 | Psy2F        | CGCACGTGTCATGTTTTTCAG                | Complete cds<br>amplification, 1276 bp |
|                                          | Psy2R        | AAACG GGACTAGTAATGTCAGTTGC<br>TATGTC |                                        |
| <b><i>NtPSY1</i></b>                     | qNtPsy1 F    | GGAACCAAGCTAATGACCCCAGAGAGA          | qRT-PCR                                |
|                                          | qNtPsy1 R    | TCAGAGATGTTGGAGAAGATGC               |                                        |
| <b><i>NtPSY2</i></b>                     | qNtPsy2 F    | TCAGAGATGTTGGAGA AGATGC              | qRT-PCR                                |
|                                          | qNtPsy2 R    | GCTTCAATCTCGTCC AATATCTTG            |                                        |
| <b><i>NtLCYB</i></b>                     | qNtLCYB F    | CCGTGTTAAATTCCACCACGCCAA             | qRT-PCR                                |
|                                          | qNtLCYB R    | GAAGCCAGTTGCATCAAGCACCCAC            |                                        |
| <b><i>NtNCED3</i></b>                    | qNtNCED3 F   | CTTTACCAAAAACAGCCGACCCACG            | qRT-PCR                                |
|                                          | qNtNCED3 R   | CACCAATGGCTTTAGGAAAAACAGGACG         |                                        |
| <b><i>NtOsmotin</i></b>                  | qNtOsmotin F | CTTCCTCCTTGCCTTGGTGACTTATACT         | qRT-PCR                                |
|                                          | qNtOsmotin R | CGTGCCATTTTAGTACCTCGTGGTGCAT         |                                        |
| <b><i>Nt EIF1<math>\alpha</math></i></b> | qNt EIF1a F  | TGAGATGCACCACGAAGCTC                 | qRT-PCR                                |
|                                          | qNt EIF1a R  | CCAACATTGTCACCAGGAAGTG               |                                        |
